# Supplementary material for: Statin use and breast cancer survival and risk: a systematic review and meta-analysis
Source: PubMed Central journal article supplement (PMC4767486; doi:10.18632/oncotarget.5557), 2015-10-12
Supplement: oncotarget-06-42988-s001.pdf [file oncotarget-06-42988-s001.pdf]

## SUPPLEMENTARY DATA

### Literature search strategy

We used the following search keywords: ((malignancies[Title/Abstract] OR malignancy[Title/Abstract]) OR (((((((neoplasm[Title/Abstract] OR neoplasms[Title/Abstract]) OR cancer[Title/Abstract]) OR cancers[Title/Abstract]) OR adenoma[Title/Abstract]) OR adenomas[Title/Abstract]) OR carcinoma[Title/Abstract]) OR carcinomas[Title/Abstract])) AND ((“hydroxymethylglutaryl-coa reductase inhibitors”[Pharmacological Action] OR “hydroxymethylglutaryl-coa reductase inhibitors”[MeSH

Terms] OR (“hydroxymethylglutaryl-coa”[All Fields] AND “reductase”[All Fields] AND “inhibitors”[All Fields]) OR “hydroxymethylglutaryl-coa reductase inhibitors”[All Fields] OR “statin”[All Fields]) OR (“hydroxymethylglutaryl-coa reductase inhibitors”[Pharmacological Action] OR “hydroxymethylglutaryl-coa reductase inhibitors”[MeSH Terms] OR (“hydroxymethylglutaryl-coa”[All Fields] AND “reductase”[All Fields] AND “inhibitors”[All Fields]) OR “hydroxymethylglutaryl-coa reductase inhibitors”[All Fields] OR “statins”[All Fields])).

**Supplementary Table S1: Quality Assessment of Included Prospective Cohort Studies for Breast Cancer Mortality**

| Study          | Exposed cohort represents average in community | Selection of the non-exposed cohort from same community | Ascertain exposure through records or structured interviews | Demonstrate that outcome not present at study start | Exposed and non-exposed matched and/or adjusted by factors | Ascertain outcome via independent blind assessment or record linkage | Follow-up long enough for outcome to occur | Loss to follow-up <20% | Overall Score |
|----------------|------------------------------------------------|---------------------------------------------------------|-------------------------------------------------------------|-----------------------------------------------------|------------------------------------------------------------|----------------------------------------------------------------------|--------------------------------------------|------------------------|---------------|
| Brewer, 2013   | 1                                              | 1                                                       | 1                                                           | 1                                                   | 2                                                          | 1                                                                    | 1                                          | 1                      | 9             |
| Cardwell, 2014 | 1                                              | 1                                                       | 1                                                           | 1                                                   | 2                                                          | 1                                                                    | 1                                          | 1                      | 9             |
| Murtola, 2014  | 1                                              | 1                                                       | 1                                                           | 1                                                   | 2                                                          | 1                                                                    | 1                                          | 0                      | 8             |
| Nickels, 2013  | 1                                              | 1                                                       | 1                                                           | 1                                                   | 2                                                          | 1                                                                    | 1                                          | 1                      | 9             |
| Desai, 2015    | 1                                              | 1                                                       | 1                                                           | 1                                                   | 2                                                          | 1                                                                    | 1                                          | 1                      | 9             |

1 means study adequately fulfilled a quality criterion, 0 means it did not. Quality scale does not imply that items are of equal relevant importance

**Supplementary Table S2: Quality Assessment of Included Prospective Studies for Breast Cancer Risk**

| Study             | Exposed cohort represents average in community | Selection of the non-exposed cohort from same community | Ascertain exposure through records or structured interviews | Demonstrate that outcome not present at study start | Exposed and non-exposed matched and/or adjusted by factors | Ascertain outcome via independent blind assessment or record linkage | Follow-up long enough for outcome to occur | Loss to follow-up <20% | Overall Score |
|-------------------|------------------------------------------------|---------------------------------------------------------|-------------------------------------------------------------|-----------------------------------------------------|------------------------------------------------------------|----------------------------------------------------------------------|--------------------------------------------|------------------------|---------------|
| Desai, 2013       | 1                                              | 1                                                       | 1                                                           | 1                                                   | 2                                                          | 1                                                                    | 1                                          | 0                      | 8             |
| Smeeth, 2008      | 1                                              | 1                                                       | 1                                                           | 1                                                   | 2                                                          | 1                                                                    | 1                                          | 0                      | 8             |
| Beck, 2003        | 1                                              | 1                                                       | 1                                                           | 1                                                   | 2                                                          | 1                                                                    | 1                                          | 0                      | 8             |
| Jacobs, 2011      | 1                                              | 1                                                       | 0                                                           | 1                                                   | 0                                                          | 0                                                                    | 1                                          | 1                      | 5             |
| Haukka, 2009      | 1                                              | 1                                                       | 1                                                           | 1                                                   | 2                                                          | 1                                                                    | 1                                          | 0                      | 8             |
| Cauley, 2003      | 1                                              | 1                                                       | 1                                                           | 1                                                   | 2                                                          | 1                                                                    | 1                                          | 0                      | 8             |
| Boudreau, 2007    | 1                                              | 1                                                       | 1                                                           | 1                                                   | 2                                                          | 1                                                                    | 1                                          | 0                      | 8             |
| Setoguchi, 2007   | 1                                              | 1                                                       | 1                                                           | 0                                                   | 2                                                          | 1                                                                    | 1                                          | 0                      | 7             |
| Friis, 2005       | 1                                              | 1                                                       | 1                                                           | 1                                                   | 2                                                          | 1                                                                    | 1                                          | 0                      | 8             |
| Eliassen, 2005    | 0                                              | 1                                                       | 0                                                           | 1                                                   | 2                                                          | 1                                                                    | 1                                          | 1                      | 7             |
| Vinogradova, 2011 | 1                                              | 1                                                       | 1                                                           | 1                                                   | 2                                                          | 0                                                                    | 1                                          | 1                      | 8             |
| Blais, 2000       | 1                                              | 1                                                       | 1                                                           | 0                                                   | 2                                                          | 1                                                                    | 1                                          | 1                      | 8             |

1 means study adequately fulfilled a quality criterion, 0 means it did not. Quality scale does not imply that items are of equal relevant importance

**Supplementary Table S3: Quality Assessment of Included Case-Control Studies for Breast Cancer Risk**

| Study            | Case defined with independent validation | Representativeness of the cases | Selection of controls from community | Statement that controls have no history of outcome | Cases and controls matched and/or adjusted by factors | Ascertain exposure by blinded structured interview | Same method of ascertainment for cases and controls | Same response rate for both groups | Overall score |
|------------------|------------------------------------------|---------------------------------|--------------------------------------|----------------------------------------------------|-------------------------------------------------------|----------------------------------------------------|-----------------------------------------------------|------------------------------------|---------------|
| McDougall, 2013  | 1                                        | 1                               | 1                                    | 0                                                  | 2                                                     | 1                                                  | 0                                                   | 1                                  | 7             |
| Graaf, 2004      | 0                                        | 1                               | 0                                    | 1                                                  | 2                                                     | 1                                                  | 1                                                   | 1                                  | 7             |
| Kaye, 2004       | 1                                        | 1                               | 1                                    | 0                                                  | 2                                                     | 1                                                  | 1                                                   | 1                                  | 8             |
| Boudreau, 2004   | 0                                        | 1                               | 1                                    | 0                                                  | 2                                                     | 1                                                  | 1                                                   | 1                                  | 7             |
| Kochhar, 2005    | 0                                        | 0                               | 1                                    | 0                                                  | 2                                                     | 1                                                  | 1                                                   | 1                                  | 6             |
| Dumasia, 2006    | 0                                        | 1                               | 1                                    | 0                                                  | 2                                                     | 0                                                  | 1                                                   | 1                                  | 6             |
| Coogan, 2007     | 1                                        | 1                               | 0                                    | 1                                                  | 2                                                     | 1                                                  | 1                                                   | 1                                  | 8             |
| Pocobelli, 2008  | 0                                        | 1                               | 1                                    | 1                                                  | 2                                                     | 1                                                  | 1                                                   | 1                                  | 8             |
| Eaton, 2009      | 1                                        | 1                               | 0                                    | 0                                                  | 2                                                     | 1                                                  | 1                                                   | 1                                  | 7             |
| Woditschka, 2010 | 0                                        | 1                               | 1                                    | 0                                                  | 2                                                     | 1                                                  | 1                                                   | 1                                  | 7             |
| Leung, 2015      | 0                                        | 1                               | 1                                    | 1                                                  | 2                                                     | 1                                                  | 1                                                   | 1                                  | 8             |

1 means study adequately fulfilled a quality criterion, 0 means it did not. Quality scale does not imply that items are of equal relevant importance

**Supplementary Table S4: Quality Assessment of Included Randomized Clinical Trials for Breast Cancer Risk**

| <b>Study</b>     | <b>Adequacy of randomization</b> | <b>Allocation concealment</b> | <b>Blinding</b> |
|------------------|----------------------------------|-------------------------------|-----------------|
| Hsia, 2011       | adequate                         | not adequately described      | adequate        |
| Nakamura, 2006   | adequate                         | not adequately described      | inadequate      |
| HPS, 2005        | adequate                         | adequate                      | adequate        |
| Strandberg, 2004 | not adequately described         | not adequately described      | adequate        |
| Shepherd, 2002   | adequate                         | adequate                      | adequate        |
| Hague, 2003      | adequate                         | not adequately described      | adequate        |
| ALLHAT-LLT, 2002 | adequate                         | adequate                      | inadequate      |
| Sacks, 1996      | adequate                         | not adequately described      | adequate        |
| Clearfield, 2001 | not adequately described         | not adequately described      | adequate        |
